# Supplementary material for: Ubiquitination Is a Novel Post-Translational Modification of VMP1 in Autophagy of Human Tumor Cells
Source: MDPI journal article supplement (doi:10.3390/ijms241612981), 2023-08-19
Supplement: s1 [file s1]

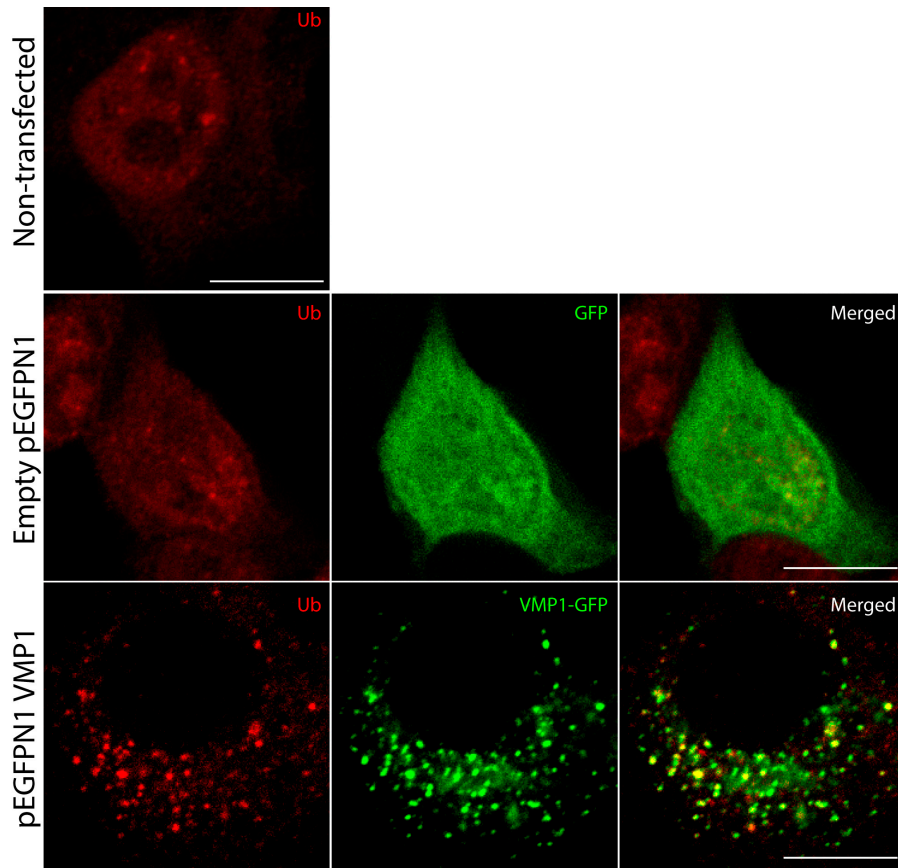

**Figure S1. Ubiquitin recruitment in PANC-1 cells.** PANC-1 cells expressing Empty pEGFPN1 or pEGFPN1 VMP1, or non-transfected PANC-1 cells, were immunolabeled with anti-ubiquitin. Scale bars: 10  $\mu$ m.

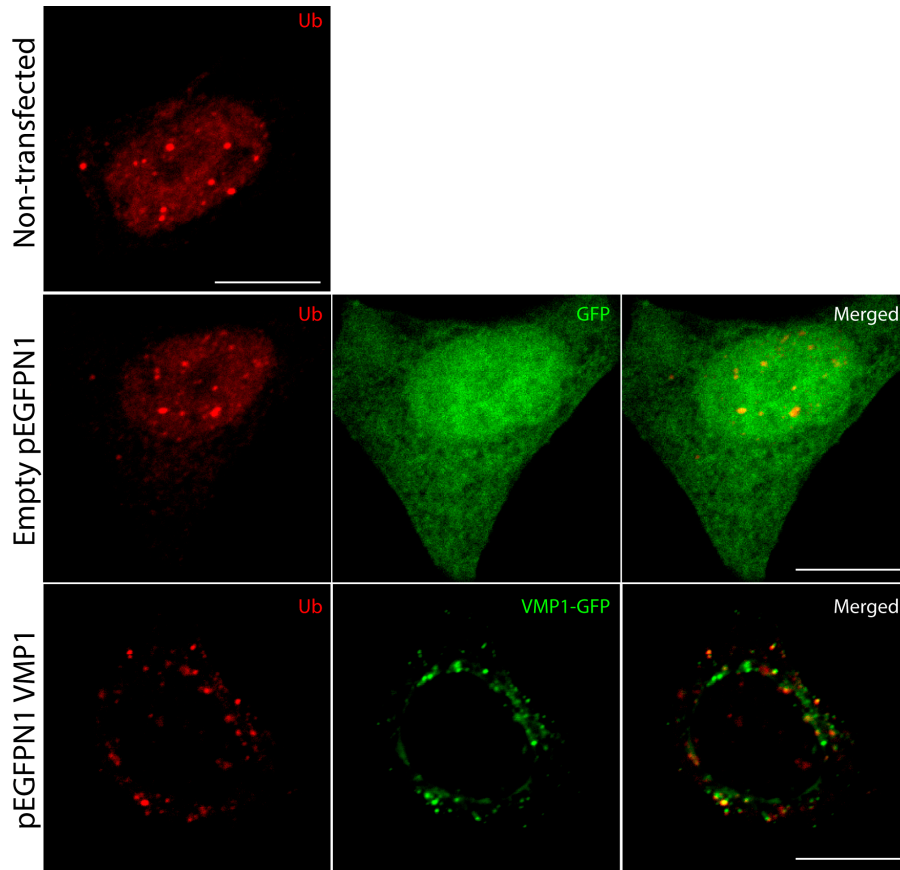

**Figure S2. Ubiquitin recruitment in MCF-7 cells.** MCF-7 cells expressing Empty pEGFPN1 or pEGFPN1 VMP1, or non-transfected MCF-7 cells, were immunolabeled with anti-ubiquitin. Scale bars: 10  $\mu$ m.

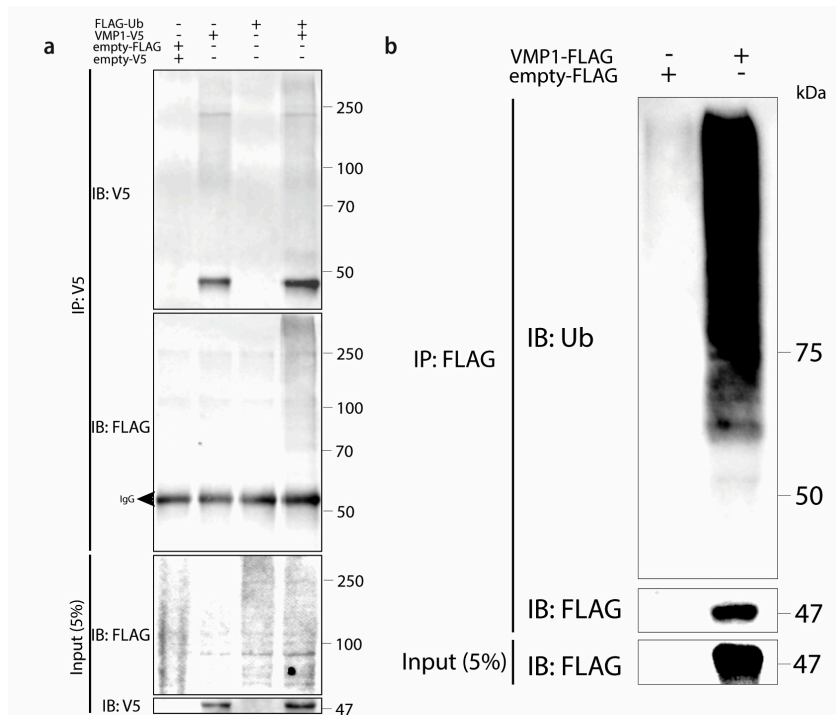

**Figure S3. Immunoprecipitation of VMP1 and Ubiquitin.** **a.** Lysates from HEK293T cells transfected with VMP1-V5, FLAG-Ub, and the combination of both were immunoprecipitated with anti-V5 magnetic beads and immunoblotted with anti-FLAG. Several bands over VMP1-V5's molecular weight (47.5 kDa) appeared in the eluate of co-transfected cells, indicating VMP1 ubiquitination. **b.** Lysates from HEK293T cells transfected with VMP1-FLAG were immunoprecipitated with anti-FLAG magnetic beads and immunoblotted with anti-Ub. Several bands over VMP1-FLAG's molecular weight (47 kDa) appeared in the eluate, indicating VMP1 ubiquitination.

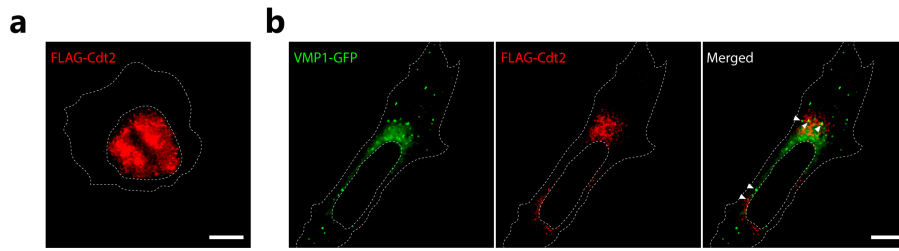

**Figure S4. FLAG-Cdt2 translocation.** (a) HeLa cells were transfected with FLAG-Cdt2 and immunolabeled with anti-FLAG. Scale Bar: 10  $\mu$ m. (b) HeLa cells were transfected with VMP1-GFP and FLAG-Cdt2 and immunolabeled with anti-FLAG. Scale Bar: 10  $\mu$ m. The images are representative of three independent experiments.
